# Supplementary material for: Efficacy and Safety of Electroacupuncture for Pain Control in Herpes Zoster: A Systematic Review and Meta-Analysis
Source: Hindawi journal article supplement (doi:10.1155/2022/4478444), 2022-07-04
Supplement: f1 [file 4478444.f1.pdf]

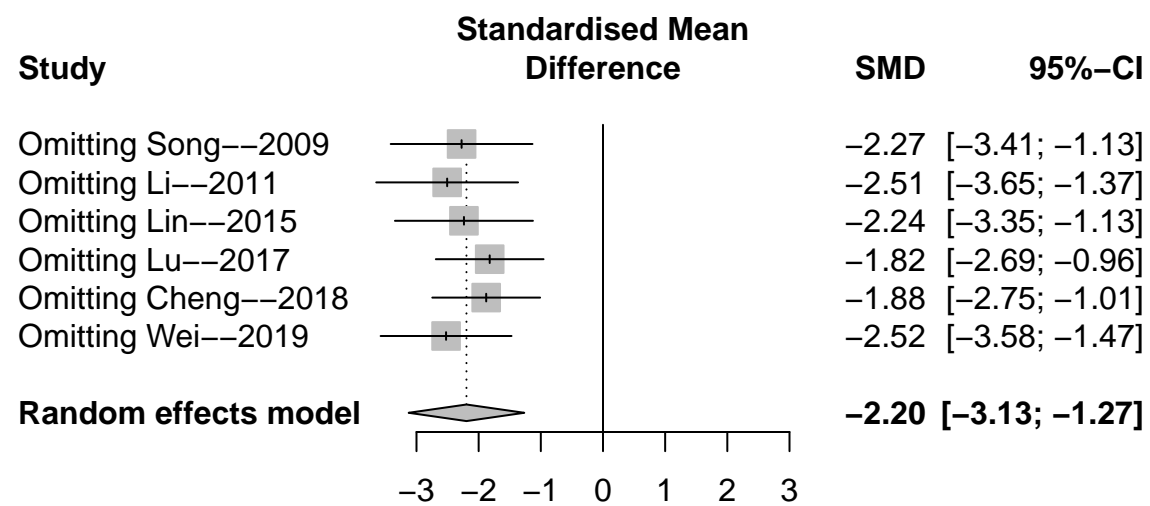

FS1, The pain severity

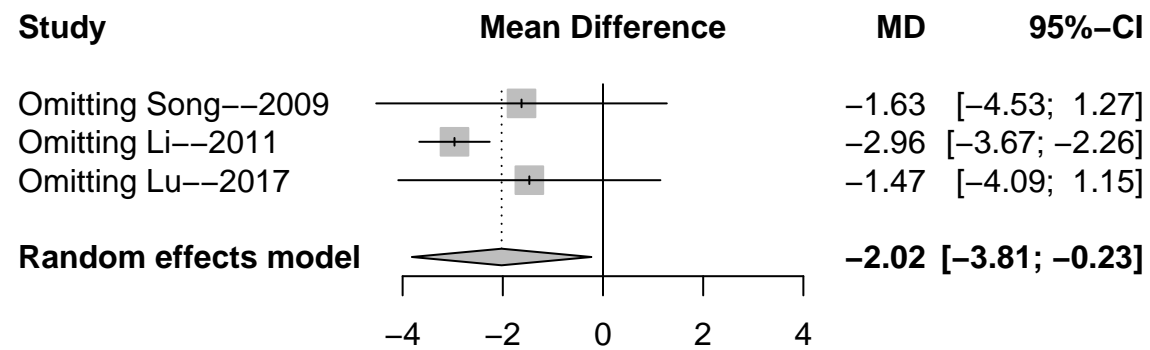

FS2, The cessation of pustules time

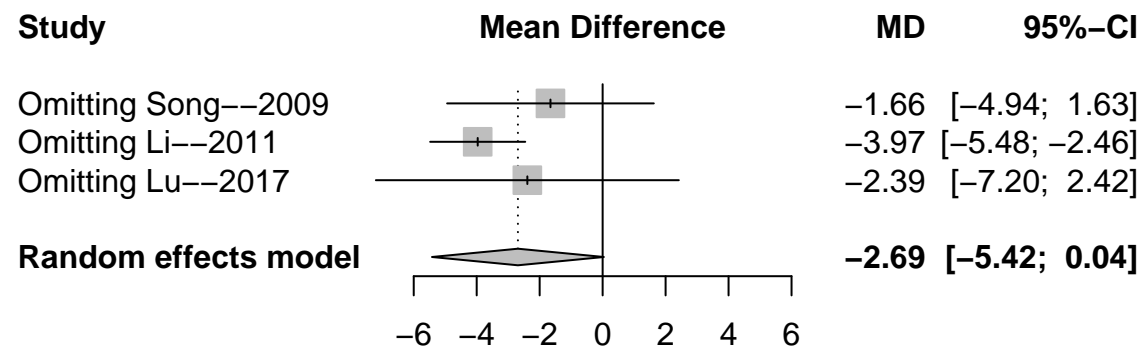

FS3, The time to scab

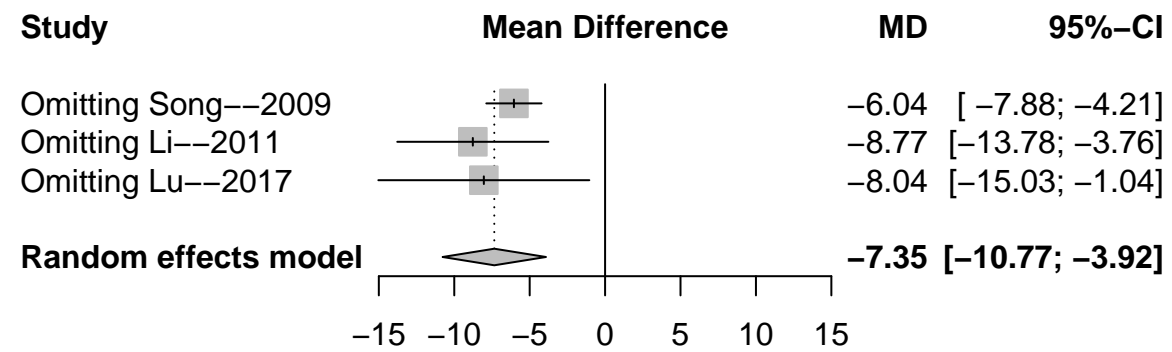

FS4, The rash healing time

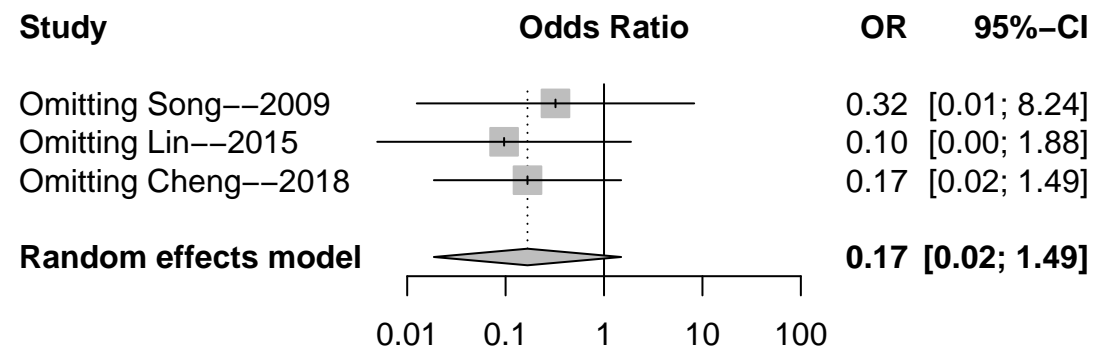

FS5, Safety evaluation

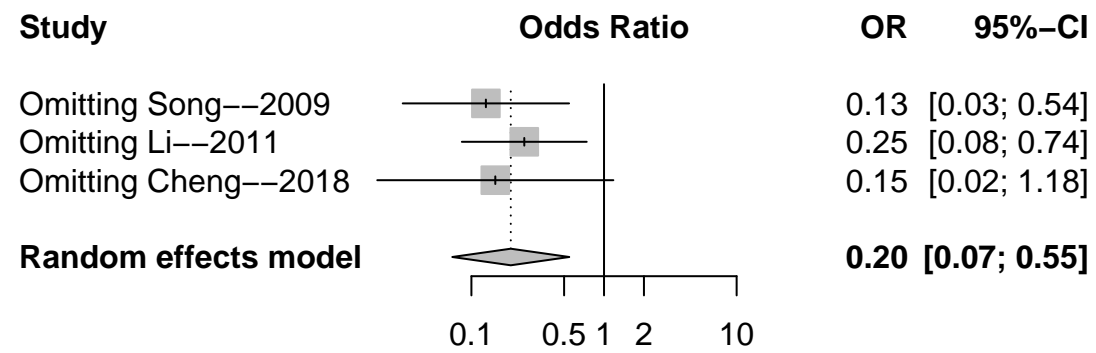

FS6, The incidence of postherpetic neuralgia
